# Supplementary material
Source: PubMed Central journal article supplement (PMC5180449)

A

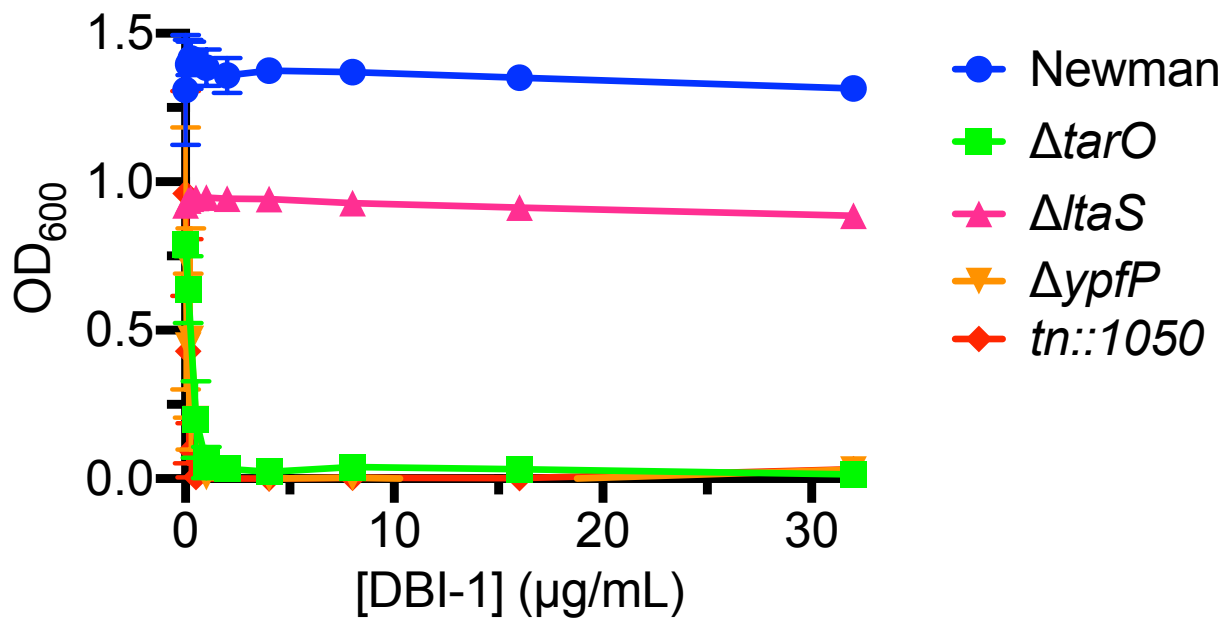

B

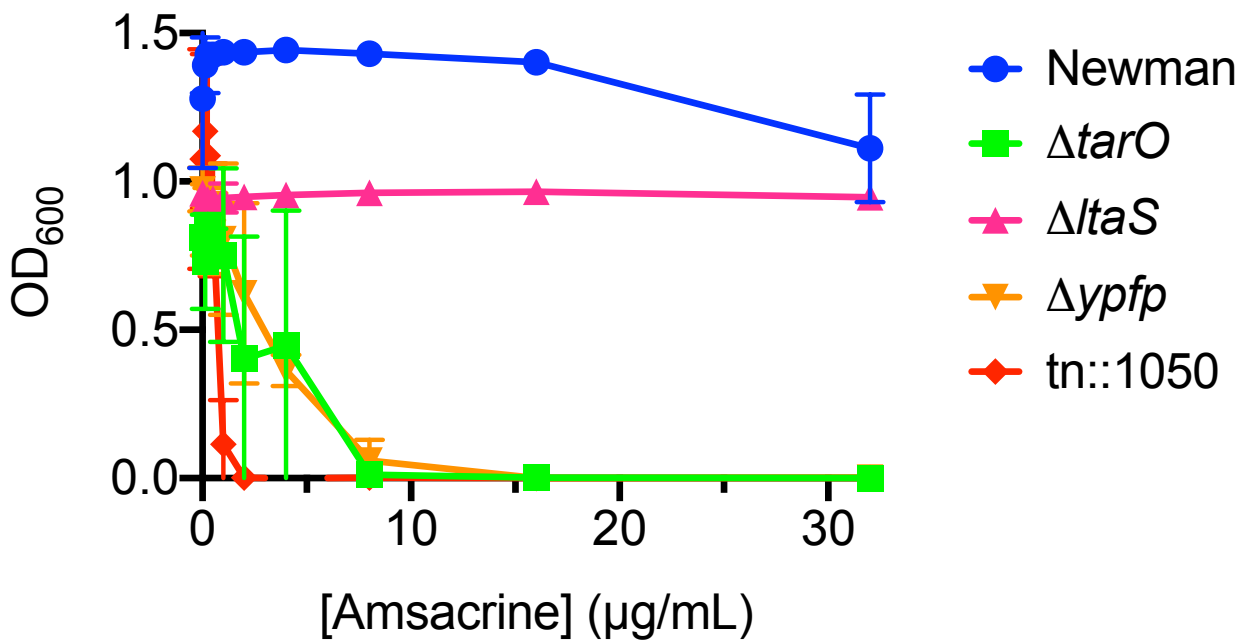

Supplement: NIHMS834068-supplement-3.pdf [file NIHMS834068-supplement-3.pdf]

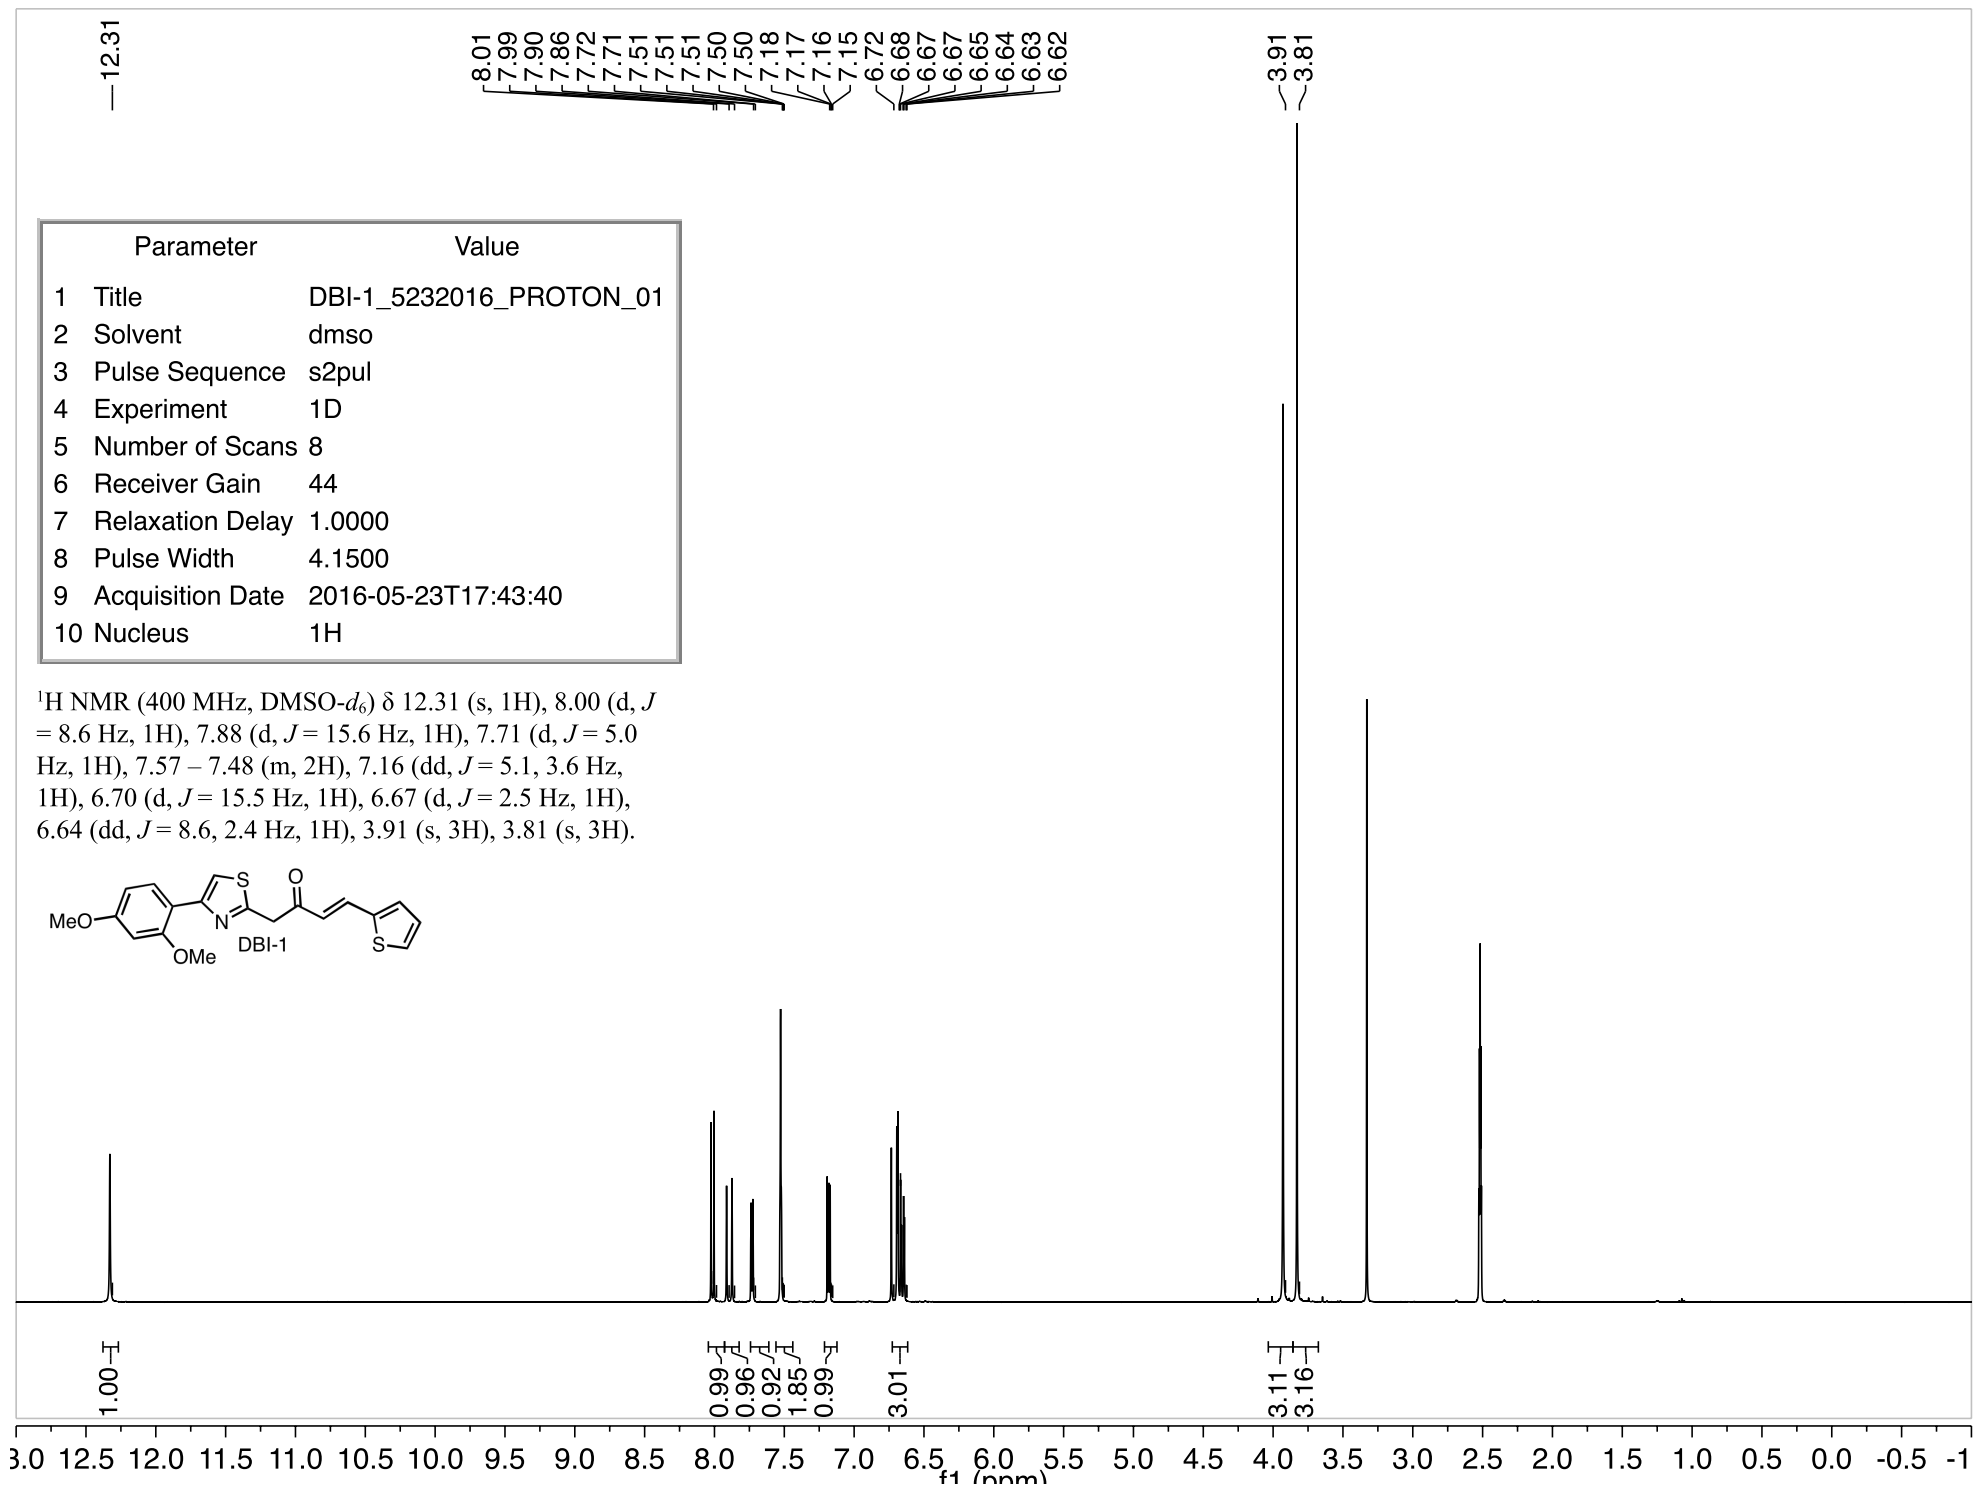

Supplement: NIHMS834068-supplement-6.pdf [file NIHMS834068-supplement-6.pdf]
